# Supplementary material
Source: Research Square preprint supplement (doi:10.21203/rs.3.rs-9479808/v1)
Supplement: Supplementary file 1 [file 77b10b7325c6a6bdf72dddeb.docx]

Table 2 Metabolite and protein fold change (log2(FC)) in E. diaphana hosts by KEGG pathway and select strain type; non-significant: NS, significant positive: red, significant negative: blue; * bold indicate DIABLO identified analytes

| **KEGG Orthology (KO), Enzyme (EC) and Compound (C)** | | **Strain comparison** | | |
| --- | --- | --- | --- | --- |
| **WT10** | | **SS5** |
| **SS8** | **SS5** | **SS8** |
| **Carbon Metabolism (Glycolysis, Sugar Metabolism, Carbohydrate Degradation, Galactose and Glyoxylate Metabolism)** | | | | |
| D-Glucosamine 6-Phosphate | C00352 | -3.02 | NS | -3.86 |
| D-Xylose | C00181 | 2.63 | NS | 2.14 |
| Galactokinase | EC 2.7.1.6 | 3.79 | 2.00 | 1.79 |
| Glucose-6-Phosphate 1-Dehydrogenase | EC 1.1.1.49 | 2.65 | 2.18 | NS |
| Glyceric Acid | C00258 | -1.61 | -2.05 | NS |
| Glycine Cleavage System H Protein (GCSH) | K02437 | -2.99 | NS | -2.62 |
| Homocitrate | C01251 | 3.42 | 1.80 | 1.62 |
| Phosphoenolpyruvic Acid (PEP) | C00074 | -2.62 | -1.42 | -1.19 |
| Phosphoserine Aminotransferase | EC 2.6.1.52 | NS | 2.65 | -2.92 |
| Propionyl-CoA Carboxylase | EC 6.4.1.3 | 3.83 | NS | 3.83 |
| **Glutathione Metabolism | Oxidative Phosphorylation** | | | | |
| ATP Synthase Subunit O | EC 7.1.1.2 | -2.01 | NS | -1.25 |
| Cytochrome B-C1 | EC 7.1.1.8 | -1.44 | NS | -1.67 |
| Cytochrome C Oxidase | EC 7.1.1.9 | -1.94 | -2.38 | -1.34 |
| ***Glutathione S-Transferase** | **EC 2.5.1.18** | **3.43** | **1.04** | **1.03** |
| V-Type Proton ATPase | EC 7.1.1.2 | -3.57 | -2.68 | 1.03 |
| **Amino Acid Biosynthesis and Metabolism** | | | | |
| ***3-Hydroxyisobutyryl-CoA Hydrolase** | **EC 3.1.2.4** | **3.92** | **1.52** | **2.41** |
| Betaine-Homocysteine S-Methyltransferase 1 | EC 2.1.1.5 | NS | NS | 3.00 |
| Citramalic Acid | C00815 | 4.02 | -3.01 | 4.02 |
| D-3-Phosphoglycerate Dehydrogenase | EC 1.1.1.95 | 1.47 | NS | NS |
| ***Glutamine Synthetase** | **EC 6.3.1.2** | **-2.10** | **NS** | **-1.49** |
| Homocysteine S-Methyltransferase 1 | EC 2.1.1.10 | 1.70 | -1.29 | 3.00 |
| L-Threonine | C00188 | -1.48 | 1.33 | -2.82 |
| Phosphoserine Aminotransferase | EC 2.6.1.52 | NS | 2.65 | -2.92 |
| Sarcosine Dehydrogenase | EC 1.5.8.3 | 1.44 | NS | 1.32 |
| **Creatine Pathway** | | | | |
| Arginine Kinase | EC 2.7.3.3 | 1.97 | -1.18 | 1.20 |
| Glycine Cleavage System H Protein (GCSH) | K02437 | -2.99 | NS | -2.62 |
| Creatine Phosphate | C02305 | 1.79 | NS | NS |
| Creatinine | C00300 | 3.91 | NS | 4.25 |
| Glyceric Acid | C00258 | -1.61 | -2.05 | NS |
| L-Threonine | C00188 | -1.48 | 1.33 | -2.82 |
| **Signalling And Heterotrophy** | | | | |
| 5-Methoxytryptamine | C05659 | -6.36 | -1.52 | -4.84 |
| Adenylate Cyclase | EC 4.6.1.1 | -4.31 | -5.35 | -1.73 |
| Adenylate Kinase-Like | EC 2.7.4.3 | NS | -1.06 | 1.28 |
| Adenylsuccinic Acid | C03794 | -5.01 | NS | -4.39 |
| Atrial Natriuretic Peptide Receptor 2 | EC 4.6.1.2 | 1.73 | NS | -1.39 |
| Purine Nucleoside Phosphorylase | EC 2.4.2.1 | NS | NS | 1.35 |
| **Phosphatidylinositol (Pi) Signalling** | | | | |
| Calmodulin Isoform X1 | CALM | 1.84 | NS | NS |
| Inositol Monophosphatase 1 | EC 3.1.3.25 | 1.62 | NS | NS |
| Multiple Inositol Polyphosphate Phosphatase 1 | EC 3.1.3.62 | -1.80 | NS | -1.80 |
| Phosphatidylinositol 4-Kinase Alpha | EC 2.7.1.67 | -3.15 | -3.15 | NS |
| **Recognition And Phagocytosis** | | | | |
| Betaine-Homocysteine S-Methyltransferase 1 | EC 2.1.1.5 | 3.00 | NS | NS |
| Citramalic Acid | C00815 | 4.02 | -3.01 | 4.02 |
| L-Threonine | C00188 | -2.82 | 1.33 | -2.82 |
| Rab GDP Dissociation Inhibitor Beta (RAB) | K17255 | 1.83 | -1.64 | 2.13 |
| Ras-Related Protein Rab-4B | K07880 | -1.10 | NS | -1.49 |
| Ras-Related Protein Rab-23 | K06234 | NS | NS | -1.43 |
| Calumenin | K23901 | NS | 1.18 | NS |
| Sarcosine Dehydrogenase | EC 1.5.8.3 | 1.32 | NS | 1.32 |
| **Transmembrane Transport and Lysosomal Activity** | | | | |
|  | Ref Seq protein |  | | |
| Major Facilitator Superfamily Profile Domain-Containing Protein | XP_020895898 | -6.06 | -6.06 | NS |
| Phospholipid-Transporting ATPase | XP_020915050 | -3.95 | -3.95 | NS |
| NPC Intracellular Cholesterol Transporter 2 | XP_020908063.2 | -3.95 | -1.12 | -2.83 |
| ABC Transporter B Family Member 25 | XP_020913168.1 | -3.94 | -3.21 | NS |
| Tetraspanin-33 | XP_020901738.1 | -1.20 | -1.36 | NS |
| Mechanosensory Protein 2 | XP_020914915.1 | -1.17 | NS | NS |
| Lysosomal Alpha-Glucosidase-Like | XP_020898999 | 3.86 | 4.44 | NS |
| Ammonium Transporter Rh Type A | XP_020893448.2 | -2.72 | NS | -2.35 |
| B(0,+)-Type Amino Acid Transporter 1 | XP_020905766.1 | -2.43 | NS | -2.31 |
| Sodium-Dependent Multivitamin Transporter | XP_020899563.1 | -3.21 | -5.47 | 2.26 |
| Excitatory Amino Acid Transporter 2 | XP_020903711.1 | -3.18 | -2.95 | NS |
| Sodium- and Chloride-Dependent GABA Transporter 1 | XP_020897749.1 | -2.94 | -2.94 | NS |
| Peptide Transporter Family 1 | XP_028516076 | -1.93 | -2.70 | NS |
| Transmembrane Protease Serine 9 | XP_028513968 | -1.87 | -2.61 | NS |
| ABC Transporter G Family Member 24 | XP_020901637 | -3.08 | -2.50 | NS |
| Epidermal Retinol Dehydrogenase 2 | XP_020895369.1 | 4.28 | -1.70 | 5.99 |
