# Supplementary material
Source: Research Square preprint supplement (doi:10.21203/rs.3.rs-9479808/v1)
Supplement: Supplementary file 2 [file c6bf6bb6771d0b94641eb401.docx]

Supplementary Information

Multi-omics uncovers molecular targets for reef restoration from heat evolved strains of a host-generalist species of dinoflagellate (*Cladocopium, Symbiodiniaceae*)


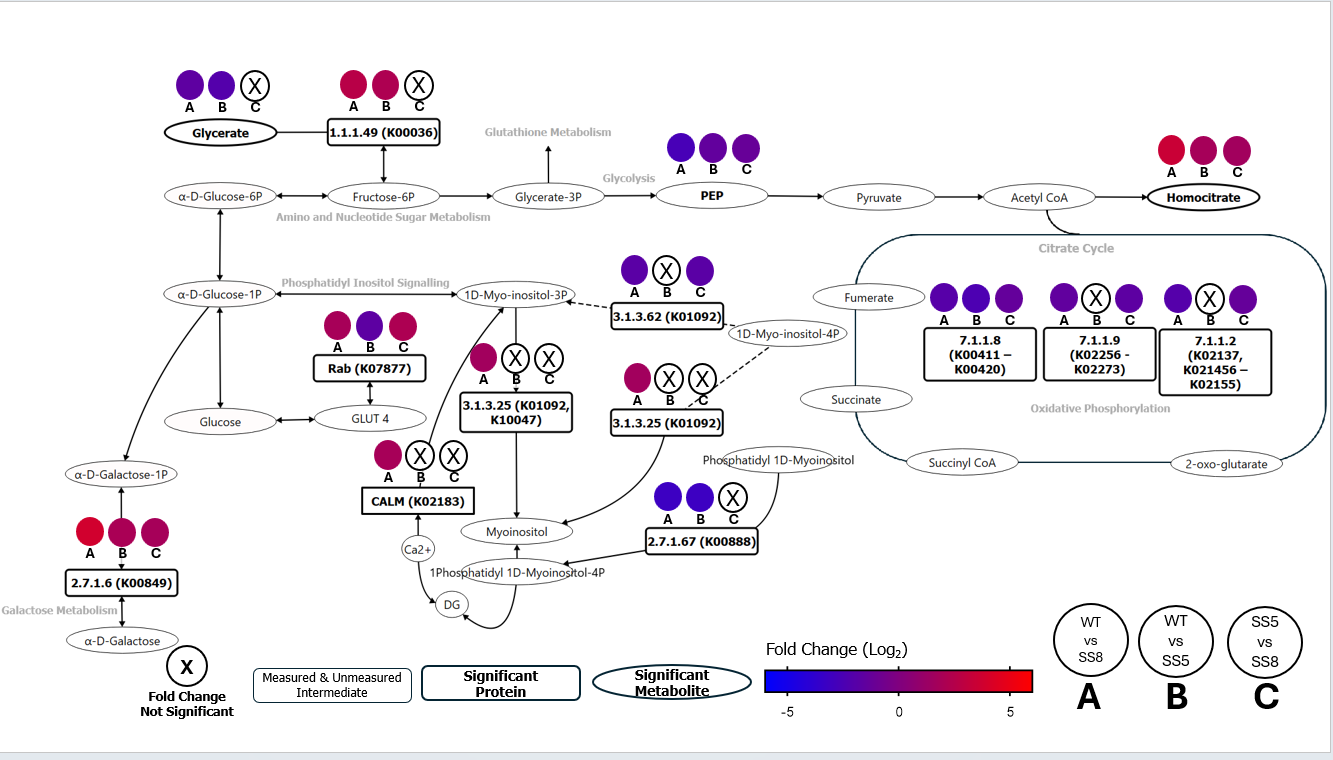


Fig S1 Carbon metabolism. Metabolite and protein fold change in *E. diaphana* hosts by KEGG pathway and select strain type comparison


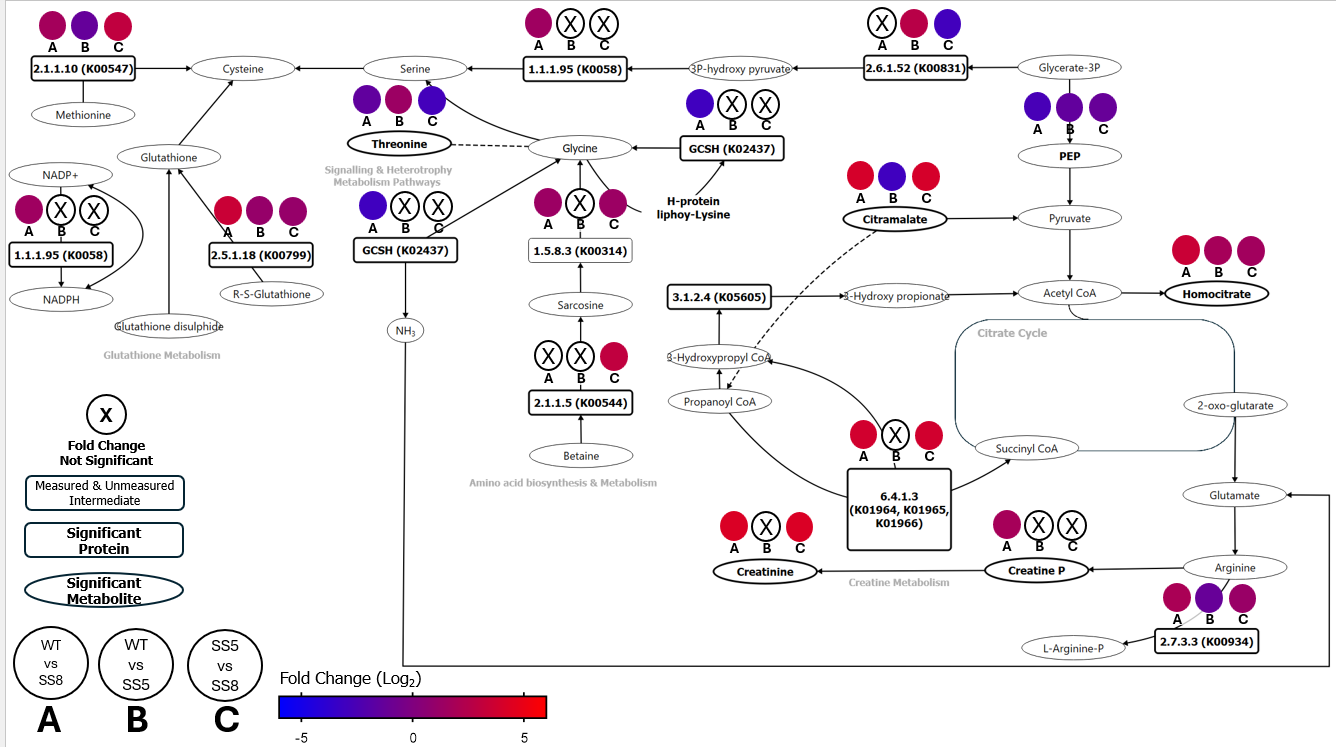


Fig S2 Glutathione metabolism. Metabolite and protein fold change in *E. diaphana* hosts by KEGG pathway and select strain type comparison


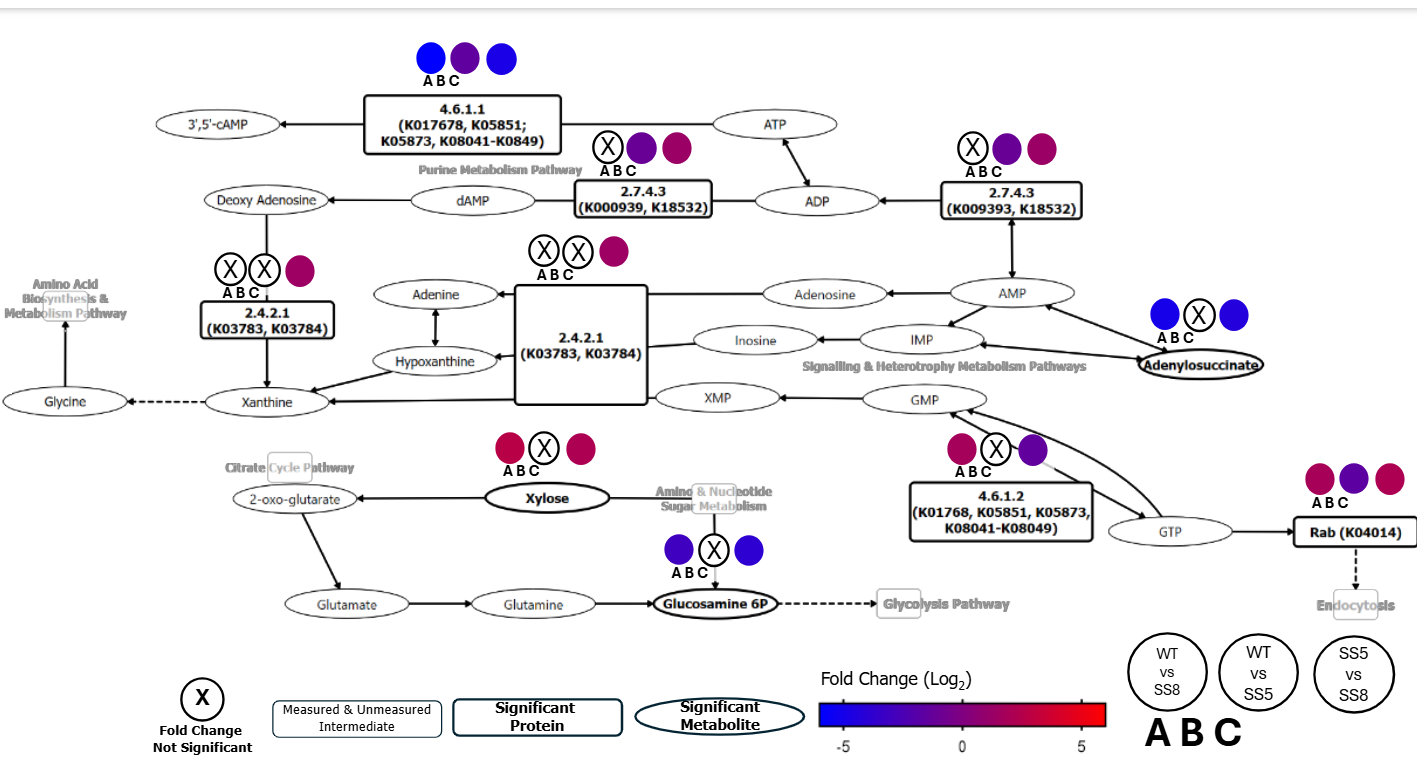


Fig S3 Nitrogen metabolism. Metabolite and protein fold change in *E. diaphana* hosts by KEGG pathway and select strain type comparison

Table S1 DIABLO outputs, dimension 1

| Protein | Variable value | Lipids | Variable value | Metabolites | Variable value |
| --- | --- | --- | --- | --- | --- |
| Glutamine synthetase | -0.202 | DG(17:2(9Z,12Z)/18:3(9Z,12Z,15Z)/0:0)[iso2] | -0.489 | beta Nicotinamide adenine dinucleotide | -0.651 |
| Glutathione S-transferase 4 isoform X1 | 0.008 | DG(19:1(9Z)/20:5(5Z,8Z,11Z,14Z,17Z)/0:0)[iso2] | -0.487 | Pterine | -0.512 |
| Uncharacterised protein 164 | 0.015 | N-(3-(15-methyl-hexadecanoyloxy)-13-methyl-tetradecanoyl)-L-serine | -0.348 | Bambuterol | -0.383 |
| Thioredoxin domain-containing protein 17 | 0.028 | PC(P-16:0/20:3(5Z,8Z,11Z)) | -0.317 | Guanosine | -0.379 |
| Hydroxyacid-oxoacid transhydrogenase, mitochondrial | 0.037 | SQDG.14.0_16.0 | -0.307 | Azimsulfuron | -0.154 |
| UPF0462 protein C4orf33 homolog | 0.041 | PS(13:0/18:3(6Z,9Z,12Z)) | -0.226 | L Cladinose | 0.011 |
| Glutathione S-transferase | 0.048 | DG(17:1(9Z)/18:0/0:0)[iso2] | -0.163 |  |  |
| UDP-N-acetylhexosamine pyrophosphorylase isoform X1 | 0.057 | Cer_NS d19:2_22:0 | -0.147 |  |  |
| 2,3-bisphosphoglycerate-independent phosphoglycerate mutase isoform X2 | 0.065 | LPC 20:4/0:0 | -0.146 |  |  |
| Glyoxylate reductase/hydroxypyruvate reductase | 0.070 | DG(22:1(13Z)/22:3(10Z,13Z,16Z)/0:0)[iso2] | -0.138 |  |  |
| Electron transfer flavoprotein subunit alpha, mitochondrial | 0.078 | PS(O-20:0/20:3(8Z,11Z,14Z)) | -0.120 |  |  |
| Flavin-containing monooxygenase FMO GS-OX-like 8 | 0.079 | LysoPC(22:4(7Z,10Z,13Z,16Z)) | -0.119 |  |  |
| Probable glutathione S-transferase 6 | 0.111 | EtherPE 16:1e_20:4 | -0.119 |  |  |
| Uncharacterised protein 229 | 0.126 | Cer_NS d19:2_20:0 | -0.101 |  |  |
| Glutathione S-transferase U19 | 0.146 | Rhodovibrin | -0.081 |  |  |
| Uncharacterised protein 246 | 0.155 | Cer(d18:2/23:0) | -0.081 |  |  |
| Acetyl-coenzyme A synthetase 2-like, mitochondrial | 0.162 | Cer(d18:2/22:0) | -0.032 |  |  |
| 3-hydroxyisobutyrate dehydrogenase, mitochondrial | 0.173 | PE(O-16:0/20:5(5Z,8Z,11Z,14Z,17Z)) | -0.024 |  |  |
| GDP-L-fucose synthase | 0.190 | LysoPC(18:0) | -0.023 |  |  |
| Dihydropteridine reductase | 0.213 | LysoPE(0:0/20:4(5Z,8Z,11Z,14Z)) | -0.012 |  |  |
| Maleylacetoacetate isomerase | 0.221 |  |  |  |  |
| Thimet oligopeptidas | 0.234 |  |  |  |  |
| Kynurenine--oxoglutarate transaminase 3 | 0.249 |  |  |  |  |
| Glutathione S-transferase | 0.258 |  |  |  |  |
| S crystallin SL11 | 0.265 |  |  |  |  |
| S.crystallin 4.1 | 0.271 |  |  |  |  |
| 3-hydroxyanthranilate 3,4-dioxygenase | 0.274 |  |  |  |  |
| Prostaglandin reductase 2 | 0.281 |  |  |  |  |
| Glutathione S-transferase Mu 5-like | 0.305 |  |  |  |  |
| Phosphoglucomutase-1 | 0.308 |  |  |  |  |

Table S2 DIABLO outputs, dimension 2

| Lipids | Variable value | Metabolites | Variable value | Proteins | Variable value |
| --- | --- | --- | --- | --- | --- |
| N,N-dimethyl-Safingol | -0.394 | Cynaroside A | 0.506 | NADH dehydrogenase [ubiquinone] flavoprotein 2, mitochondrial | -0.646 |
| 12alpha-Hydroxy-3-oxo-5beta-cholan-24-oic Acid | -0.280 | 3-(1,1-Dimethylallyl)scopoletin 7-glucoside | 0.460 | Low-density lipoprotein receptor-related protein 4 | -0.614 |
| Zymosterol intermediate 1c | -0.246 | Lamioside | 0.426 | Glutamyl aminopeptidase isoform X1 | -0.411 |
| 8-oxo-3,7-Dimethyl-6E-octenyl acetate | -0.091 | Aeglin | 0.384 | Soma ferritin | -0.149 |
| DG(16:0/17:0/0:0)[iso2] | -0.014 | Zingerone glucoside | 0.370 | Carbonic anhydrase 2 | -0.117 |
| 25-hydroxy-16,17,23,23,24,24-hexadehydrovitamin D3 / 25-hydroxy-16,17,23,23,24,24-hexadehydrocholecalciferol | -0.012 | Eremosulphoxinolide A | 0.254 |  |  |
| LPC 0:0/18:1 | 0.004 | D-Sedoheptulose-7-phosphate | 0.036 |  |  |
| TG(12:0/12:0/22:5(7Z,10Z,13Z,16Z,19Z))[iso3] | 0.005 |  |  |  |  |
| GlcCer(d18:2/16:0) | 0.005 |  |  |  |  |
| TG(12:0/14:0/18:3(9Z,12Z,15Z))[iso6] | 0.014 |  |  |  |  |
| FAHFA 2:0_18:0 | 0.016 |  |  |  |  |
| PC(16:1(9Z)/P-18:1(11Z)) | 0.018 |  |  |  |  |
| TG(13:0/14:1(9Z)/18:2(9Z,12Z))[iso6] | 0.024 |  |  |  |  |
| TG(14:1(9Z)/14:1(9Z)/14:1(9Z)) | 0.026 |  |  |  |  |
| PA(P-20:0/22:6(4Z,7Z,10Z,13Z,16Z,19Z)) | 0.029 |  |  |  |  |
| Prephytoene diphosphate | 0.034 |  |  |  |  |
| TG(13:0/17:1(9Z)/22:5(7Z,10Z,13Z,16Z,19Z))[iso6] | 0.036 |  |  |  |  |
| 3alpha,7alpha,12alpha,26-tetrahydroxy-5alpha-cholestan-27-oic acid | 0.038 |  |  |  |  |
| 14:0(5Me[R],9Me[R],13Me) | 0.038 |  |  |  |  |
| DG(22:5(7Z,10Z,13Z,16Z,19Z)/22:6(4Z,7Z,10Z,13Z,16Z,19Z)/0:0)[iso2] | 0.041 |  |  |  |  |
| 2-demethylmenaquinone-8 | 0.046 |  |  |  |  |
| LPC 17:0/0:0 | 0.050 |  |  |  |  |
| DGTS 4:0_13:0 | 0.056 |  |  |  |  |
| C16 Sphinganine | 0.065 |  |  |  |  |
| PC(O-1:0/O-16:0)[U] | 0.071 |  |  |  |  |
| Phytyl diphosphate | 0.072 |  |  |  |  |
| PA 2.0_16.3 | 0.075 |  |  |  |  |
| Cer_AP t20:0_24:0 | 0.078 |  |  |  |  |
| TG(12:0/13:0/20:5(5Z,8Z,11Z,14Z,17Z))[iso6] | 0.079 |  |  |  |  |
| N-(26-hydroxyhexacosanyl)sphinganine | 0.080 |  |  |  |  |
| DG(20:1(11Z)/22:3(10Z,13Z,16Z)/0:0)[iso2] | 0.080 |  |  |  |  |
| Cucurbitaxanthin A | 0.081 |  |  |  |  |
| TG(12:0/12:0/16:1(9Z))[iso3] | 0.092 |  |  |  |  |
| 16:0-Glc-Cholesterol | 0.107 |  |  |  |  |
| Carboceric acid | 0.112 |  |  |  |  |
| Persin | 0.112 |  |  |  |  |
| PC(O-12:0/O-1:0) | 0.115 |  |  |  |  |
| 4-amino-4-deoxy-alpha-L-arabinopyranosyl undecaprenyl phosphate | 0.118 |  |  |  |  |
| TG(15:1(9Z)/18:2(9Z,12Z)/22:6(4Z,7Z,10Z,13Z,16Z,19Z))[iso6] | 0.118 |  |  |  |  |
| Hexacosanedioic acid | 0.125 |  |  |  |  |
| PC(14:1(9Z)/24:1(15Z)) | 0.129 |  |  |  |  |
| PC(P-20:0/12:0) | 0.143 |  |  |  |  |
| Cer(t20:0/26:0(2OH)) | 0.165 |  |  |  |  |
| Anhydrorhodovibrin | 0.203 |  |  |  |  |
| 3-Oxochola-1,4,6-trien-24-oic Acid | 0.204 |  |  |  |  |
| SM(d18:2/14:0) | 0.218 |  |  |  |  |
| Oleic acid(d2) | 0.237 |  |  |  |  |
| PE-Cer(d14:2(4E,6E)/19:0) | 0.248 |  |  |  |  |
| DG(17:2(9Z,12Z)/20:0/0:0)[iso2] | 0.284 |  |  |  |  |
| PA(O-16:0/20:5(5Z,8Z,11Z,14Z,17Z)) | 0.364 |  |  |  |  |
